# Supplementary material
Source: PubMed Central journal article supplement (PMC2692490)
Supplement: NIHMS96239-supplement-supplement_1.pdf [file NIHMS96239-supplement-supplement_1.pdf]

## Supplemental Movie Captions

Supplemental Movie #1: Illustrates the transport of ICG to the axilla with the bright regions representing axillary nodes of a 37 year old male. The movie first shows lymphatic vessels draining into the axillary nodes, after a few seconds the camera is shifted to show the lymphatic drainage of the arm.

Supplemental Movie #2: Illustrates the active transport of ICG from injection sites across the inner elbow towards the axilla of a 41 year old female. This video was acquired during hand massage performed by a trained lymphedema specialist.

Supplemental Movie #3: Illustrates the active lymph flow in both legs of a 40 year old female.

Supplemental Movie #4: Illustrates the transit of packets of lymph up the leg of a 40 year old female.

Supplemental Movie #5: Illustrating the backflow of lymph thought to be due to valvular insufficiency in a 46 year old female. As a packet of lymph is propelled forward, a portion of it drains back into the propelling lymphangion. This video was acquired during foot massage performed by a trained lymphedema specialist.
